# Supplementary material for: Effects of substituent groups on methane adsorption in covalent organic frameworks
Source: Royal Society of Chemistry journal article supplement (doi:10.1039/c3ra47429a), 2014-01-01
Supplement: c3ra47429a1.pdf [file c3ra47429a1.pdf]

## Electronic Supplementary Information

# Effects of Substituent Groups on Methane Adsorption in Covalent Organic Frameworks

Jianfei Zhao and Tianying Yan\*

*Tianjin Key Laboratory of Metal- and Molecule-Based Material Chemistry, Key Laboratory of Advanced Energy Materials Chemistry (Ministry of Education), The Co-Innovation Center of Chemistry and Chemical Engineering of Tianjin, Institute of New Energy Material Chemistry, College of Chemistry, Nankai University, Tianjin 300071, China.*

\*Corresponding Author: tyan@nankai.edu.cn.

### I. Experimental covalent organic frameworks (all with space group: I-43D)<sup>1</sup>

COF-102

Lattice parameters:  $a=b=c=27.177\text{\AA}$ ;  $\alpha=\beta=\gamma=90^\circ$

| Atom | x       | y       | z       |
|------|---------|---------|---------|
| B1   | 0.83533 | 0.71325 | 0.26216 |
| O1   | 0.82850 | 0.74693 | 0.30298 |
| C1   | 0.90490 | 0.76629 | 0.22758 |
| C2   | 0.87894 | 0.72231 | 0.22630 |
| C3   | 0.93120 | 0.69419 | 0.16049 |
| C4   | 0.95634 | 0.73930 | 0.15960 |
| C5   | 0.89252 | 0.68630 | 0.19272 |
| C6   | 0.94306 | 0.77459 | 0.19484 |
| C7   | 1.00000 | 0.75000 | 0.12500 |
| H1   | 0.89552 | 0.79460 | 0.25352 |
| H2   | 0.94125 | 0.66415 | 0.13717 |
| H3   | 0.87377 | 0.65150 | 0.19176 |
| H4   | 0.96223 | 0.80911 | 0.19660 |

## COF-103

Lattice parameters:  $a=b=c=28.248\text{\AA}$ ;  $\alpha=\beta=\gamma=90^\circ$ 

| Atom | x       | y       | z       |
|------|---------|---------|---------|
| B1   | 0.24102 | 0.17052 | 0.21731 |
| O1   | 0.20173 | 0.17738 | 0.24979 |
| C1   | 0.34070 | 0.07966 | 0.20001 |
| C2   | 0.33591 | 0.05139 | 0.24007 |
| C3   | 0.30021 | 0.06125 | 0.27253 |
| C4   | 0.26989 | 0.09921 | 0.26533 |
| C5   | 0.27496 | 0.12788 | 0.22549 |
| C6   | 0.31062 | 0.11783 | 0.19290 |
| Si1  | 0.37500 | 0.00000 | 0.25000 |
| H1   | 0.36748 | 0.07242 | 0.17407 |
| H2   | 0.29575 | 0.03949 | 0.30345 |
| H3   | 0.24263 | 0.10607 | 0.29100 |
| H4   | 0.31517 | 0.13920 | 0.16171 |

## COF-105

Lattice parameters:  $a=b=c=44.886\text{\AA}$ ;  $\alpha=\beta=\gamma=90^\circ$ 

| Atom | x       | y       | z       |
|------|---------|---------|---------|
| B1   | 0.28905 | 0.10906 | 0.22877 |
| O1   | 0.24923 | 0.26434 | 0.11672 |
| O2   | 0.12931 | 0.20284 | 0.29149 |
| Si1  | 0.37500 | 0.00000 | 0.25000 |
| C1   | 0.22645 | 0.21781 | 0.18335 |
| C2   | 0.20018 | 0.23477 | 0.19174 |
| C3   | 0.23455 | 0.25261 | 0.14166 |
| C4   | 0.20882 | 0.26778 | 0.14873 |
| C5   | 0.19137 | 0.25958 | 0.17328 |
| C6   | 0.24387 | 0.22787 | 0.15826 |
| C7   | 0.35228 | 0.05035 | 0.21728 |
| C8   | 0.34987 | 0.03288 | 0.24348 |
| C9   | 0.32755 | 0.03978 | 0.26475 |
| C10  | 0.30811 | 0.06410 | 0.26008 |
| C11  | 0.31075 | 0.08180 | 0.23403 |
| C12  | 0.33294 | 0.07478 | 0.21265 |
| H1   | 0.17131 | 0.27270 | 0.17680 |
| H2   | 0.26464 | 0.21763 | 0.15114 |

|    |         |         |         |
|----|---------|---------|---------|
| H3 | 0.36894 | 0.04522 | 0.20028 |
| H4 | 0.33529 | 0.08803 | 0.19228 |
| H5 | 0.32518 | 0.02632 | 0.28497 |
| H6 | 0.29108 | 0.06904 | 0.27686 |

## II. Substituted covalent organic frameworks (all with space group: I-43D)<sup>a)</sup>

### II.1 COF-102-X

#### COF-102-Cl

Lattice parameters:  $a=b=c=27.354\text{\AA}$ ;  $\alpha=\beta=\gamma=90^\circ$

| Atom | x       | y       | Z       |
|------|---------|---------|---------|
| B1   | 0.46449 | 0.58466 | 0.01163 |
| O1   | 0.42407 | 0.55226 | 0.00357 |
| C1   | 0.51805 | 0.65215 | 0.97845 |
| C2   | 0.47338 | 0.62660 | 0.97798 |
| C3   | 0.44581 | 0.68133 | 0.91314 |
| C4   | 0.49118 | 0.70696 | 0.91089 |
| C5   | 0.43722 | 0.64182 | 0.94478 |
| C6   | 0.52700 | 0.69092 | 0.94576 |
| C7   | 0.50000 | 0.75000 | 0.87500 |
| H1   | 0.54493 | 0.64229 | 0.00261 |
| H2   | 0.41696 | 0.69152 | 0.89190 |
| H3   | 0.40391 | 0.62457 | 0.94369 |
| Cl1  | 0.58400 | 0.71482 | 0.95133 |

#### COF-102-Br

Lattice parameters:  $a=b=c=27.357\text{\AA}$ ;  $\alpha=\beta=\gamma=90^\circ$

| Atom | x       | y       | Z       |
|------|---------|---------|---------|
| B1   | 0.46459 | 0.58445 | 0.01135 |
| O1   | 0.42421 | 0.55197 | 0.00342 |
| C1   | 0.51756 | 0.65271 | 0.97880 |
| C2   | 0.47339 | 0.62635 | 0.97761 |
| C3   | 0.44624 | 0.68018 | 0.91183 |

|     |         |         |         |
|-----|---------|---------|---------|
| C4  | 0.49106 | 0.70684 | 0.91062 |
| C5  | 0.43770 | 0.64069 | 0.94352 |
| C6  | 0.52645 | 0.69146 | 0.94616 |
| C7  | 0.50000 | 0.75000 | 0.87500 |
| H1  | 0.54424 | 0.64356 | 0.00342 |
| H2  | 0.41771 | 0.68952 | 0.88982 |
| H3  | 0.40478 | 0.62277 | 0.94179 |
| Br1 | 0.58876 | 0.71812 | 0.95363 |

### COF-102-I

Lattice parameters:  $a=b=c=27.386\text{\AA}$ ;  $\alpha=\beta=\gamma=90^\circ$

| Atom | x       | y       | z       |
|------|---------|---------|---------|
| B1   | 0.46548 | 0.58360 | 0.01053 |
| O1   | 0.42514 | 0.55113 | 0.00260 |
| C1   | 0.51740 | 0.65322 | 0.97948 |
| C2   | 0.47424 | 0.62550 | 0.97686 |
| C3   | 0.44794 | 0.67809 | 0.90993 |
| C4   | 0.49165 | 0.70653 | 0.91040 |
| C5   | 0.43950 | 0.63848 | 0.94140 |
| C6   | 0.52629 | 0.69221 | 0.94715 |
| C7   | 0.50000 | 0.75000 | 0.87500 |
| H1   | 0.54331 | 0.64481 | 0.00509 |
| H2   | 0.41993 | 0.68609 | 0.88686 |
| H3   | 0.40735 | 0.61944 | 0.93853 |
| I1   | 0.59415 | 0.72264 | 0.95851 |

### COF-102-CF<sub>3</sub>

Lattice parameters:  $a=b=c=27.492\text{\AA}$ ;  $\alpha=\beta=\gamma=90^\circ$

| Atom | x       | y       | z       |
|------|---------|---------|---------|
| B1   | 0.46632 | 0.58342 | 0.01090 |
| O1   | 0.42599 | 0.55148 | 0.00230 |
| C1   | 0.51710 | 0.65510 | 0.98333 |
| C2   | 0.47598 | 0.62524 | 0.97767 |
| C3   | 0.45297 | 0.67572 | 0.90904 |
| C4   | 0.49497 | 0.70643 | 0.91174 |
| C5   | 0.44383 | 0.63621 | 0.93981 |
| C6   | 0.52822 | 0.69464 | 0.95145 |

|    |         |         |         |
|----|---------|---------|---------|
| C7 | 0.50000 | 0.75000 | 0.87500 |
| H1 | 0.53948 | 0.64764 | 0.01236 |
| H2 | 0.42627 | 0.68163 | 0.88413 |
| H3 | 0.41291 | 0.61594 | 0.93454 |
| C8 | 0.57402 | 0.72196 | 0.96551 |
| F1 | 0.56295 | 0.75917 | 0.99666 |
| F2 | 0.60027 | 0.74106 | 0.92803 |
| F3 | 0.60842 | 0.69360 | 0.98789 |

### COF-102-NH<sub>2</sub>

Lattice parameters: a=b=c=27.352Å;  $\alpha=\beta=\gamma=90^\circ$

| Atom | x       | y       | z       |
|------|---------|---------|---------|
| B1   | 0.46415 | 0.58497 | 0.01173 |
| O1   | 0.42377 | 0.55240 | 0.00389 |
| C1   | 0.51708 | 0.65337 | 0.97932 |
| C2   | 0.47297 | 0.62684 | 0.97789 |
| C3   | 0.44600 | 0.68015 | 0.91145 |
| C4   | 0.49079 | 0.70686 | 0.91058 |
| C5   | 0.43746 | 0.64089 | 0.94343 |
| C6   | 0.52612 | 0.69200 | 0.94648 |
| C7   | 0.50000 | 0.75000 | 0.87500 |
| H1   | 0.54329 | 0.64413 | 0.00438 |
| H2   | 0.41777 | 0.68892 | 0.88884 |
| H3   | 0.40472 | 0.62269 | 0.94165 |
| N1   | 0.57054 | 0.71278 | 0.95118 |
| H4   | 0.59275 | 0.70219 | 0.97669 |
| H5   | 0.58065 | 0.73851 | 0.92913 |

### COF-102-CN

Lattice parameters: a=b=c=27.388Å;  $\alpha=\beta=\gamma=90^\circ$

| Atom | x       | y       | z       |
|------|---------|---------|---------|
| B1   | 0.46572 | 0.58390 | 0.01094 |
| O1   | 0.42524 | 0.55168 | 0.00266 |
| C1   | 0.51936 | 0.65170 | 0.97832 |
| C2   | 0.47477 | 0.62608 | 0.97765 |
| C3   | 0.44695 | 0.68123 | 0.91344 |
| C4   | 0.49218 | 0.70689 | 0.91112 |

|    |         |         |         |
|----|---------|---------|---------|
| C5 | 0.43859 | 0.64155 | 0.94474 |
| C6 | 0.52826 | 0.69106 | 0.94593 |
| C7 | 0.50000 | 0.75000 | 0.87500 |
| H1 | 0.54570 | 0.64089 | 0.00284 |
| H2 | 0.41789 | 0.69144 | 0.89260 |
| H3 | 0.40537 | 0.62430 | 0.94372 |
| C8 | 0.57155 | 0.71098 | 0.94996 |
| N1 | 0.60987 | 0.72755 | 0.95375 |

### COF-102-OCH<sub>3</sub>

Lattice parameters:  $a=b=c=27.284\text{\AA}$ ;  $\alpha=\beta=\gamma=90^\circ$

| Atom | x       | y       | z       |
|------|---------|---------|---------|
| B1   | 0.46351 | 0.58569 | 0.01236 |
| O1   | 0.42302 | 0.55310 | 0.00442 |
| C1   | 0.51776 | 0.65224 | 0.97755 |
| C2   | 0.47233 | 0.62770 | 0.97849 |
| C3   | 0.44391 | 0.68336 | 0.91441 |
| C4   | 0.49014 | 0.70733 | 0.91088 |
| C5   | 0.43539 | 0.64400 | 0.94643 |
| C6   | 0.52697 | 0.69092 | 0.94447 |
| C7   | 0.50000 | 0.75000 | 0.87500 |
| H1   | 0.54484 | 0.64152 | 0.00096 |
| H2   | 0.41486 | 0.69460 | 0.89386 |
| H3   | 0.40162 | 0.62754 | 0.94653 |
| O2   | 0.57208 | 0.71282 | 0.94372 |
| C8   | 0.61507 | 0.70495 | 0.97300 |
| H4   | 0.64369 | 0.73016 | 0.96103 |
| H5   | 0.60731 | 0.71207 | 0.01160 |
| H6   | 0.62852 | 0.66754 | 0.96866 |

### COF-102-CH<sub>3</sub>

Lattice parameters:  $a=b=c=27.459\text{\AA}$ ;  $\alpha=\beta=\gamma=90^\circ$

| Atom | x       | y       | z       |
|------|---------|---------|---------|
| B1   | 0.46525 | 0.58414 | 0.01121 |
| O1   | 0.42492 | 0.55187 | 0.00318 |
| C1   | 0.51638 | 0.65505 | 0.98209 |
| C2   | 0.47452 | 0.62586 | 0.97758 |

|    |         |         |         |
|----|---------|---------|---------|
| C3 | 0.45072 | 0.67626 | 0.90853 |
| C4 | 0.49320 | 0.70630 | 0.91079 |
| C5 | 0.44174 | 0.63713 | 0.94005 |
| C6 | 0.52678 | 0.69374 | 0.94948 |
| C7 | 0.50000 | 0.75000 | 0.87500 |
| H1 | 0.54013 | 0.64735 | 0.00984 |
| H2 | 0.42392 | 0.68252 | 0.88378 |
| H3 | 0.41062 | 0.61670 | 0.93565 |
| C8 | 0.57425 | 0.71801 | 0.96019 |
| H4 | 0.57020 | 0.74148 | 0.99201 |
| H5 | 0.58794 | 0.73978 | 0.93041 |
| H6 | 0.60272 | 0.69124 | 0.96760 |

## II.2 COF-103-X

### COF-103-C1

Lattice parameters:  $a=b=c=27.785\text{\AA}$ ;  $\alpha=\beta=\gamma=90^\circ$

| Atom | x       | y       | z       |
|------|---------|---------|---------|
| B1   | 0.46499 | 0.58305 | 0.01092 |
| O1   | 0.42527 | 0.55087 | 0.00332 |
| C1   | 0.44617 | 0.67687 | 0.91230 |
| C2   | 0.49020 | 0.70321 | 0.91237 |
| C3   | 0.52516 | 0.68925 | 0.94721 |
| C4   | 0.51668 | 0.65086 | 0.97921 |
| C5   | 0.47339 | 0.62434 | 0.97759 |
| C6   | 0.43820 | 0.63790 | 0.94362 |
| Si1  | 0.50000 | 0.75000 | 0.87500 |
| H1   | 0.41831 | 0.68560 | 0.88978 |
| H2   | 0.40607 | 0.61968 | 0.94167 |
| H3   | 0.54284 | 0.64216 | 0.00378 |
| Cl1  | 0.57976 | 0.71586 | 0.95348 |

## COF-103-Br

Lattice parameters:  $a=b=c=27.787\text{\AA}$ ;  $\alpha=\beta=\gamma=90^\circ$ 

| Atom | x       | y       | z       |
|------|---------|---------|---------|
| B1   | 0.46534 | 0.58266 | 0.01049 |
| O1   | 0.42564 | 0.55044 | 0.00295 |
| C1   | 0.44676 | 0.67595 | 0.91130 |
| C2   | 0.49029 | 0.70306 | 0.91215 |
| C3   | 0.52493 | 0.68952 | 0.94745 |
| C4   | 0.51655 | 0.65106 | 0.97932 |
| C5   | 0.47367 | 0.62395 | 0.97715 |
| C6   | 0.43884 | 0.63693 | 0.94258 |
| Si1  | 0.50000 | 0.75000 | 0.87500 |
| H1   | 0.41920 | 0.68413 | 0.88824 |
| H2   | 0.40703 | 0.61823 | 0.94016 |
| H3   | 0.54256 | 0.64288 | 0.00417 |
| Br1  | 0.58460 | 0.71914 | 0.95544 |

## COF-103-I

Lattice parameters:  $a=b=c=27.819\text{\AA}$ ;  $\alpha=\beta=\gamma=90^\circ$ 

| Atom | x       | y       | z       |
|------|---------|---------|---------|
| B1   | 0.46664 | 0.58147 | 0.00936 |
| O1   | 0.42697 | 0.54931 | 0.00177 |
| C1   | 0.44889 | 0.67412 | 0.90968 |
| C2   | 0.49136 | 0.70272 | 0.91202 |
| C3   | 0.52530 | 0.68998 | 0.94839 |
| C4   | 0.51691 | 0.65113 | 0.97975 |
| C5   | 0.47498 | 0.62286 | 0.97623 |
| C6   | 0.44106 | 0.63487 | 0.94057 |
| Si1  | 0.50000 | 0.75000 | 0.87500 |
| H1   | 0.42187 | 0.68134 | 0.88579 |
| H2   | 0.40996 | 0.61527 | 0.93706 |
| H3   | 0.54219 | 0.64345 | 0.00543 |
| I1   | 0.59016 | 0.72360 | 0.96062 |



COF-103-CF<sub>3</sub>

Lattice parameters: a=b=c=27.930Å; α=β=γ=90°

| Atom | x       | y       | z       |
|------|---------|---------|---------|
| B1   | 0.46599 | 0.58305 | 0.01157 |
| O1   | 0.42624 | 0.55158 | 0.00310 |
| C1   | 0.45324 | 0.67326 | 0.91027 |
| C2   | 0.49470 | 0.70308 | 0.91401 |
| C3   | 0.52733 | 0.69238 | 0.95322 |
| C4   | 0.51616 | 0.65361 | 0.98464 |
| C5   | 0.47561 | 0.62417 | 0.97874 |
| C6   | 0.44415 | 0.63463 | 0.94100 |
| Si1  | 0.50000 | 0.75000 | 0.87500 |
| H1   | 0.42728 | 0.67893 | 0.88497 |
| H2   | 0.41380 | 0.61449 | 0.93573 |
| H3   | 0.53815 | 0.64650 | 0.01338 |
| C7   | 0.57216 | 0.71981 | 0.96712 |
| F1   | 0.56051 | 0.75630 | 0.99758 |
| F2   | 0.59498 | 0.74026 | 0.92908 |
| F3   | 0.60703 | 0.69205 | 0.98762 |

COF-103-NH<sub>2</sub>

Lattice parameters: a=b=c=27.782Å; α=β=γ=90°

| Atom | x       | y       | z       |
|------|---------|---------|---------|
| B1   | 0.46565 | 0.58250 | 0.01022 |
| O1   | 0.42594 | 0.55024 | 0.00272 |
| C1   | 0.44760 | 0.67518 | 0.91025 |
| C2   | 0.49057 | 0.70308 | 0.91219 |
| C3   | 0.52487 | 0.69047 | 0.94829 |
| C4   | 0.51636 | 0.65177 | 0.97999 |
| C5   | 0.47400 | 0.62389 | 0.97692 |
| C6   | 0.43974 | 0.63618 | 0.94153 |
| Si1  | 0.50000 | 0.75000 | 0.87500 |
| H1   | 0.42068 | 0.68251 | 0.88623 |
| H2   | 0.40843 | 0.61679 | 0.93850 |
| H3   | 0.54161 | 0.64367 | 0.00562 |
| N1   | 0.56717 | 0.71342 | 0.95472 |
| H4   | 0.58880 | 0.70326 | 0.98027 |
| H5   | 0.57666 | 0.74026 | 0.93457 |

## COF-103-CN

Lattice parameters:  $a=b=c=27.853\text{\AA}$ ;  $\alpha=\beta=\gamma=90^\circ$ 

| Atom | x       | y       | z       |
|------|---------|---------|---------|
| B1   | 0.46698 | 0.58176 | 0.00985 |
| O1   | 0.42718 | 0.54994 | 0.00182 |
| C1   | 0.44892 | 0.67606 | 0.91210 |
| C2   | 0.49229 | 0.70313 | 0.91298 |
| C3   | 0.52716 | 0.68963 | 0.94854 |
| C4   | 0.51852 | 0.65043 | 0.97982 |
| C5   | 0.47573 | 0.62337 | 0.97711 |
| C6   | 0.44108 | 0.63682 | 0.94280 |
| Si1  | 0.50000 | 0.75000 | 0.87500 |
| H1   | 0.42122 | 0.68440 | 0.88946 |
| H2   | 0.40934 | 0.61823 | 0.94021 |
| H3   | 0.54371 | 0.64093 | 0.00518 |
| C7   | 0.56846 | 0.71166 | 0.95460 |
| N1   | 0.60470 | 0.73074 | 0.95958 |

COF-103-OCH<sub>3</sub>Lattice parameters:  $a=b=c=27.726\text{\AA}$ ;  $\alpha=\beta=\gamma=90^\circ$ 

| Atom | x       | y       | z       |
|------|---------|---------|---------|
| B1   | 0.46410 | 0.58376 | 0.01129 |
| O1   | 0.42438 | 0.55129 | 0.00401 |
| C1   | 0.44497 | 0.67676 | 0.91139 |
| C2   | 0.48891 | 0.70332 | 0.91196 |
| C3   | 0.52411 | 0.69042 | 0.94688 |
| C4   | 0.51548 | 0.65206 | 0.97923 |
| C5   | 0.47232 | 0.62503 | 0.97761 |
| C6   | 0.43718 | 0.63803 | 0.94316 |
| Si1  | 0.50000 | 0.75000 | 0.87500 |
| H1   | 0.41753 | 0.68506 | 0.88816 |
| H2   | 0.40525 | 0.61938 | 0.94121 |
| H3   | 0.54129 | 0.64355 | 0.00408 |
| O2   | 0.56663 | 0.71539 | 0.94816 |
| C7   | 0.60746 | 0.71136 | 0.97981 |
| H4   | 0.63446 | 0.73808 | 0.96938 |
| H5   | 0.59684 | 0.71836 | 0.01714 |
| H6   | 0.62370 | 0.67554 | 0.97721 |

COF-103-CH<sub>3</sub>

Lattice parameters: a=b=c=27.867Å; α=β=γ=90°

| Atom | x       | y       | z       |
|------|---------|---------|---------|
| B1   | 0.46971 | 0.57899 | 0.00701 |
| O1   | 0.42996 | 0.54709 | 0.99910 |
| C1   | 0.45174 | 0.67338 | 0.90955 |
| C2   | 0.49353 | 0.70274 | 0.91286 |
| C3   | 0.52724 | 0.69099 | 0.95031 |
| C4   | 0.51891 | 0.65035 | 0.97986 |
| C5   | 0.47795 | 0.62107 | 0.97478 |
| C6   | 0.44438 | 0.63329 | 0.93912 |
| Si1  | 0.50000 | 0.75000 | 0.87500 |
| H1   | 0.42488 | 0.68046 | 0.88557 |
| H2   | 0.41386 | 0.61313 | 0.93472 |
| H3   | 0.54296 | 0.64183 | 0.00636 |
| C7   | 0.57081 | 0.71983 | 0.96275 |
| H4   | 0.55990 | 0.75185 | 0.98250 |
| H5   | 0.59105 | 0.73074 | 0.93124 |
| H6   | 0.59613 | 0.70044 | 0.98560 |

II.3 COF-105-X

COF-105-Cl

Lattice parameters: a=b=c=43.855Å; α=β=γ=90°

| Atom | x       | y       | z       |
|------|---------|---------|---------|
| B1   | 0.47794 | 0.64475 | 0.96150 |
| O1   | 0.49777 | 0.63596 | 0.98626 |
| O2   | 0.45213 | 0.62437 | 0.96016 |
| Si1  | 0.50000 | 0.75000 | 0.87500 |
| C1   | 0.47488 | 0.56898 | 0.03414 |
| C2   | 0.44815 | 0.56067 | 0.01690 |
| C3   | 0.48370 | 0.61159 | 0.99869 |
| C4   | 0.45709 | 0.60461 | 0.98318 |
| C5   | 0.43935 | 0.57969 | 0.99185 |
| C6   | 0.49274 | 0.59430 | 0.02380 |
| C7   | 0.46573 | 0.70417 | 0.89929 |
| C8   | 0.49386 | 0.72045 | 0.89881 |

|     |         |         |         |
|-----|---------|---------|---------|
| C9  | 0.51632 | 0.71133 | 0.92048 |
| C10 | 0.51099 | 0.68710 | 0.94090 |
| C11 | 0.48330 | 0.67078 | 0.94033 |
| C12 | 0.46068 | 0.67959 | 0.91927 |
| H1  | 0.42021 | 0.57654 | 0.97919 |
| H2  | 0.51261 | 0.60108 | 0.03359 |
| H3  | 0.44792 | 0.70996 | 0.88533 |
| H4  | 0.44017 | 0.66827 | 0.91851 |
| H5  | 0.52771 | 0.68133 | 0.95624 |
| Cl1 | 0.55120 | 0.72771 | 0.92380 |

COF-105-Br

Lattice parameters:  $a=b=c=43.861\text{Å}$ ;  $\alpha=\beta=\gamma=90^\circ$

| Atom | x       | y       | z       |
|------|---------|---------|---------|
| B1   | 0.47810 | 0.64446 | 0.96117 |
| O1   | 0.49786 | 0.63579 | 0.98603 |
| O2   | 0.45240 | 0.62396 | 0.95974 |
| Si1  | 0.50000 | 0.75000 | 0.87500 |
| C1   | 0.47512 | 0.56872 | 0.03385 |
| C2   | 0.44842 | 0.56036 | 0.01660 |
| C3   | 0.48386 | 0.61136 | 0.99842 |
| C4   | 0.45734 | 0.60425 | 0.98282 |
| C5   | 0.43966 | 0.57930 | 0.99148 |
| C6   | 0.49290 | 0.59411 | 0.02355 |
| C7   | 0.46607 | 0.70356 | 0.89862 |
| C8   | 0.49390 | 0.72035 | 0.89866 |
| C9   | 0.51613 | 0.71150 | 0.92065 |
| C10  | 0.51086 | 0.68722 | 0.94097 |
| C11  | 0.48342 | 0.67051 | 0.94001 |
| C12  | 0.46104 | 0.67894 | 0.91855 |
| H1   | 0.42058 | 0.57606 | 0.97874 |
| H2   | 0.51270 | 0.60100 | 0.03339 |
| H3   | 0.44844 | 0.70900 | 0.88430 |
| H4   | 0.44073 | 0.66730 | 0.91746 |
| H5   | 0.52748 | 0.68177 | 0.95650 |
| Br1  | 0.55426 | 0.72977 | 0.92504 |

## COF-105-I

Lattice parameters:  $a=b=c=43.893\text{\AA}$ ;  $\alpha=\beta=\gamma=90^\circ$ 

| Atom | x       | y       | z       |
|------|---------|---------|---------|
| B1   | 0.47908 | 0.64348 | 0.96030 |
| O1   | 0.49862 | 0.63499 | 0.98536 |
| O2   | 0.45366 | 0.62268 | 0.95855 |
| Si1  | 0.50000 | 0.75000 | 0.87500 |
| C1   | 0.47618 | 0.56764 | 0.03280 |
| C2   | 0.44956 | 0.55922 | 0.01548 |
| C3   | 0.48478 | 0.61040 | 0.99754 |
| C4   | 0.45852 | 0.60306 | 0.98168 |
| C5   | 0.44096 | 0.57801 | 0.99022 |
| C6   | 0.49378 | 0.59321 | 0.02269 |
| C7   | 0.46749 | 0.70219 | 0.89742 |
| C8   | 0.49459 | 0.72009 | 0.89855 |
| C9   | 0.51634 | 0.71184 | 0.92133 |
| C10  | 0.51110 | 0.68726 | 0.94129 |
| C11  | 0.48434 | 0.66966 | 0.93932 |
| C12  | 0.46256 | 0.67737 | 0.91707 |
| H1   | 0.42209 | 0.57461 | 0.97727 |
| H2   | 0.51339 | 0.60031 | 0.03270 |
| H3   | 0.45023 | 0.70693 | 0.88249 |
| H4   | 0.44274 | 0.66504 | 0.91518 |
| H5   | 0.52723 | 0.68219 | 0.95742 |
| I1   | 0.55771 | 0.73283 | 0.92854 |

COF-105-CF<sub>3</sub>Lattice parameters:  $a=b=c=43.986\text{\AA}$ ;  $\alpha=\beta=\gamma=90^\circ$ 

| Atom | x       | y       | z       |
|------|---------|---------|---------|
| B1   | 0.47857 | 0.64565 | 0.96332 |
| O1   | 0.49704 | 0.63761 | 0.98922 |
| O2   | 0.45335 | 0.62479 | 0.96087 |
| Si1  | 0.50000 | 0.75000 | 0.75000 |
| C1   | 0.47353 | 0.57042 | 0.03606 |
| C2   | 0.44719 | 0.5622  | 0.01832 |
| C3   | 0.48286 | 0.61318 | 0.00114 |
| C4   | 0.45728 | 0.60561 | 0.98446 |
| C5   | 0.43945 | 0.58074 | 0.99268 |

|     |         |         |         |
|-----|---------|---------|---------|
| C6  | 0.49108 | 0.59619 | 0.02660 |
| C7  | 0.47077 | 0.70120 | 0.89776 |
| C8  | 0.49699 | 0.72029 | 0.89990 |
| C9  | 0.51784 | 0.71382 | 0.92475 |
| C10 | 0.51068 | 0.68976 | 0.94534 |
| C11 | 0.48487 | 0.67118 | 0.94193 |
| C12 | 0.46494 | 0.67713 | 0.91780 |
| H1  | 0.42113 | 0.57723 | 0.97908 |
| H2  | 0.51018 | 0.60361 | 0.03724 |
| H3  | 0.45437 | 0.70441 | 0.88153 |
| H4  | 0.44573 | 0.66418 | 0.91478 |
| H5  | 0.52465 | 0.68555 | 0.96369 |
| C13 | 0.54671 | 0.73084 | 0.93290 |
| F1  | 0.54030 | 0.75330 | 0.95339 |
| F2  | 0.56052 | 0.74463 | 0.90882 |
| F3  | 0.56923 | 0.71242 | 0.94408 |

COF-105-NH<sub>2</sub>

Lattice parameters: a=b=c=43.851Å;  $\alpha=\beta=\gamma=90^\circ$

| Atom | x       | y       | z       |
|------|---------|---------|---------|
| B1   | 0.47831 | 0.64421 | 0.96080 |
| O1   | 0.49790 | 0.63574 | 0.98588 |
| O2   | 0.45281 | 0.62344 | 0.95916 |
| Si1  | 0.50000 | 0.75000 | 0.87500 |
| C1   | 0.47541 | 0.56843 | 0.03352 |
| C2   | 0.44875 | 0.55999 | 0.01622 |
| C3   | 0.48402 | 0.61117 | 0.99816 |
| C4   | 0.45770 | 0.60383 | 0.98235 |
| C5   | 0.44010 | 0.57879 | 0.99095 |
| C6   | 0.49304 | 0.59399 | 0.02335 |
| C7   | 0.46671 | 0.70277 | 0.89759 |
| C8   | 0.49406 | 0.72030 | 0.89861 |
| C9   | 0.51593 | 0.71221 | 0.92133 |
| C10  | 0.51058 | 0.68774 | 0.94148 |
| C11  | 0.48361 | 0.67033 | 0.93968 |
| C12  | 0.46172 | 0.67812 | 0.91748 |
| H1   | 0.57882 | 0.92462 | 0.97805 |
| H2   | 0.48731 | 0.89893 | 0.03333 |
| H3   | 0.55044 | 0.79251 | 0.88249 |
| H4   | 0.55819 | 0.83414 | 0.91580 |

|    |         |         |         |
|----|---------|---------|---------|
| H5 | 0.47338 | 0.81755 | 0.95765 |
| N1 | 0.45717 | 0.77336 | 0.92520 |
| H6 | 0.44338 | 0.77983 | 0.94131 |
| H7 | 0.45115 | 0.75641 | 0.91236 |

COF-105-CN

Lattice parameters:  $a=b=c=43.915\text{\AA}$ ;  $\alpha=\beta=\gamma=90^\circ$

| Atom | x       | y       | z       |
|------|---------|---------|---------|
| B1   | 0.48004 | 0.64346 | 0.96063 |
| O1   | 0.49962 | 0.63458 | 0.98552 |
| O2   | 0.45444 | 0.62290 | 0.95884 |
| Si1  | 0.50000 | 0.75000 | 0.87500 |
| C1   | 0.47670 | 0.56719 | 0.03259 |
| C2   | 0.45009 | 0.55901 | 0.01519 |
| C3   | 0.48562 | 0.61003 | 0.99757 |
| C4   | 0.45926 | 0.60303 | 0.98176 |
| C5   | 0.44155 | 0.57804 | 0.99012 |
| C6   | 0.49452 | 0.59262 | 0.02258 |
| C7   | 0.46785 | 0.70314 | 0.89892 |
| C8   | 0.49539 | 0.72028 | 0.89915 |
| C9   | 0.51777 | 0.71172 | 0.92144 |
| C10  | 0.51254 | 0.68686 | 0.94134 |
| C11  | 0.48536 | 0.66982 | 0.93987 |
| C12  | 0.46308 | 0.67827 | 0.91846 |
| H1   | 0.42261 | 0.57488 | 0.97724 |
| H2   | 0.51423 | 0.59943 | 0.03258 |
| H3   | 0.45012 | 0.70845 | 0.88476 |
| H4   | 0.44294 | 0.66642 | 0.91714 |
| H5   | 0.52866 | 0.68075 | 0.95728 |
| C13  | 0.54400 | 0.72570 | 0.92498 |
| N1   | 0.56701 | 0.73782 | 0.92787 |

COF-105-OCH<sub>3</sub>

Lattice parameters:  $a=b=c=43.790\text{\AA}$ ;  $\alpha=\beta=\gamma=90^\circ$

| Atom | x       | y       | z       |
|------|---------|---------|---------|
| B1   | 0.47699 | 0.64525 | 0.96154 |
| O1   | 0.49683 | 0.63670 | 0.98646 |

|     |         |         |         |
|-----|---------|---------|---------|
| O2  | 0.45123 | 0.62472 | 0.96027 |
| Si1 | 0.50000 | 0.75000 | 0.87500 |
| C1  | 0.47419 | 0.56967 | 0.03464 |
| C2  | 0.44742 | 0.56121 | 0.01743 |
| C3  | 0.48283 | 0.61227 | 0.99899 |
| C4  | 0.45624 | 0.60508 | 0.98346 |
| C5  | 0.43856 | 0.58010 | 0.99225 |
| C6  | 0.49195 | 0.59509 | 0.02422 |
| C7  | 0.46483 | 0.70412 | 0.89852 |
| C8  | 0.49290 | 0.72053 | 0.89849 |
| C9  | 0.51540 | 0.71207 | 0.92029 |
| C10 | 0.50992 | 0.68784 | 0.94085 |
| C11 | 0.48231 | 0.67123 | 0.94016 |
| C12 | 0.45982 | 0.67968 | 0.91873 |
| H1  | 0.41943 | 0.57679 | 0.97958 |
| H2  | 0.51178 | 0.60202 | 0.03403 |
| H3  | 0.44733 | 0.70963 | 0.88406 |
| H4  | 0.43944 | 0.66808 | 0.91785 |
| H5  | 0.52636 | 0.68216 | 0.95640 |
| O3  | 0.54251 | 0.72756 | 0.92072 |
| C13 | 0.56869 | 0.72453 | 0.94029 |
| H6  | 0.58592 | 0.74126 | 0.93352 |
| H7  | 0.56249 | 0.72887 | 0.96409 |
| H8  | 0.57867 | 0.70173 | 0.93832 |

COF-105-CH<sub>3</sub>

Lattice parameters: a=b=c=43.923Å;  $\alpha=\beta=\gamma=90^\circ$

| Atom | x       | y       | z       |
|------|---------|---------|---------|
| B1   | 0.48198 | 0.64100 | 0.95802 |
| O1   | 0.50147 | 0.63240 | 0.98307 |
| O2   | 0.45698 | 0.61977 | 0.95570 |
| Si1  | 0.50000 | 0.75000 | 0.87500 |
| C1   | 0.47965 | 0.56418 | 0.02944 |
| C2   | 0.45313 | 0.55578 | 0.01201 |
| C3   | 0.48799 | 0.60737 | 0.99471 |
| C4   | 0.46198 | 0.59988 | 0.97856 |
| C5   | 0.44466 | 0.57456 | 0.98672 |
| C6   | 0.49705 | 0.58999 | 0.01967 |
| C7   | 0.46957 | 0.70125 | 0.89696 |
| C8   | 0.49604 | 0.71992 | 0.89891 |



|     |         |         |         |
|-----|---------|---------|---------|
| C9  | 0.51759 | 0.71258 | 0.92262 |
| C10 | 0.51263 | 0.68660 | 0.94119 |
| C11 | 0.48676 | 0.66794 | 0.93789 |
| C12 | 0.46518 | 0.67566 | 0.91558 |
| H1  | 0.42602 | 0.57102 | 0.97353 |
| H2  | 0.51649 | 0.59721 | 0.02987 |
| H3  | 0.45239 | 0.70574 | 0.88190 |
| H4  | 0.44589 | 0.66268 | 0.91293 |
| H5  | 0.52799 | 0.68110 | 0.95790 |
| C13 | 0.54511 | 0.73104 | 0.93054 |
| H6  | 0.53809 | 0.75133 | 0.94306 |
| H7  | 0.55802 | 0.73798 | 0.91060 |
| H8  | 0.56120 | 0.71886 | 0.94512 |

<sup>a)</sup>The geometry optimizations were performed with DREIDING force field<sup>2</sup> and conjugate gradient algorithm. During the whole process of optimization, all of them are treated as P1 space group with all atoms and full cell flexibility. After the optimization, all the frameworks still hold ctn topology with I-43D space group. By using the above method, we also optimize the basic COF-102, COF-103, and COF-105. Their optimized structures possess ctn topology and the cell lengths are 27.262 Å (COF-102), 27.759 Å (COF-103), and 43.821 Å (COF-105) respectively, comparable with their experimental data, i.e. 27.1771 Å (COF-102), 28.2477 Å (COF-103), and 44.8860 Å (COF-105) respectively.

## References

1. H. M. El-Kaderi, J. R. Hunt, J. L. Mendoza-Cortes, A. P. Cote, R. E. Taylor, M. O'Keeffe and O. M. Yaghi, *Science*, 2007, 316, 268-272.
2. S. L. Mayo, B. D. Olafson and W. A. Goddard, *J. Phys. Chem.*, 1990, 94, 8897-8909.

III. Complete figures for excess methane uptake and methane delivery of COF-102-Xs and COF-103-Xs.

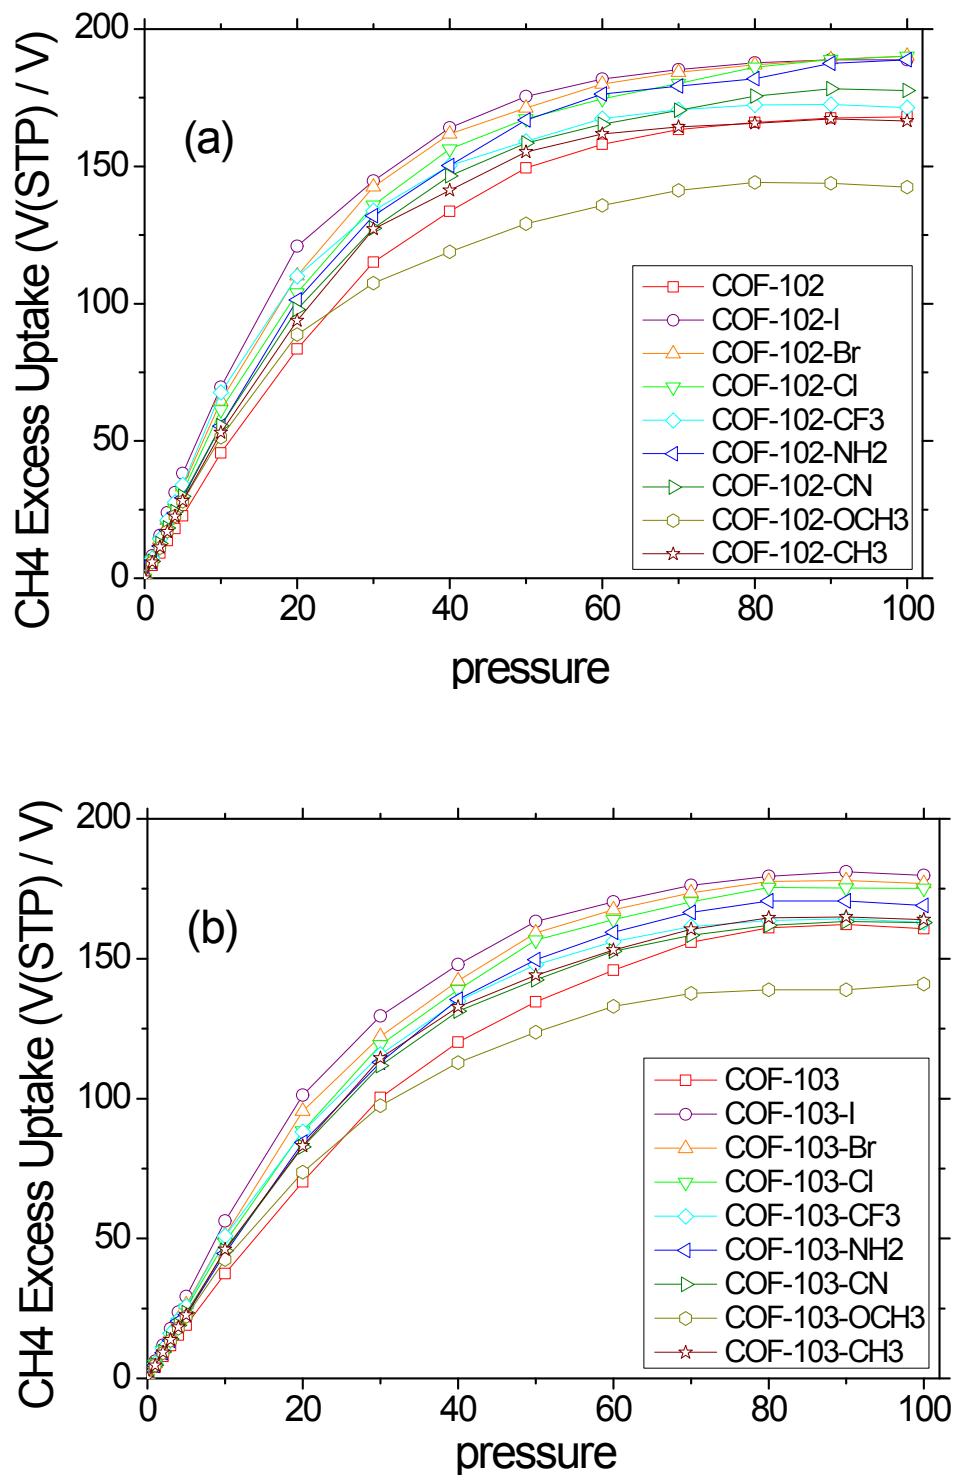

**Figure S1.** Complete isotherms of excess volumetric methane uptake at 298 K from 0 to 100 bar. (a) is for COF-102-Xs and (b) is for COF-103-Xs.

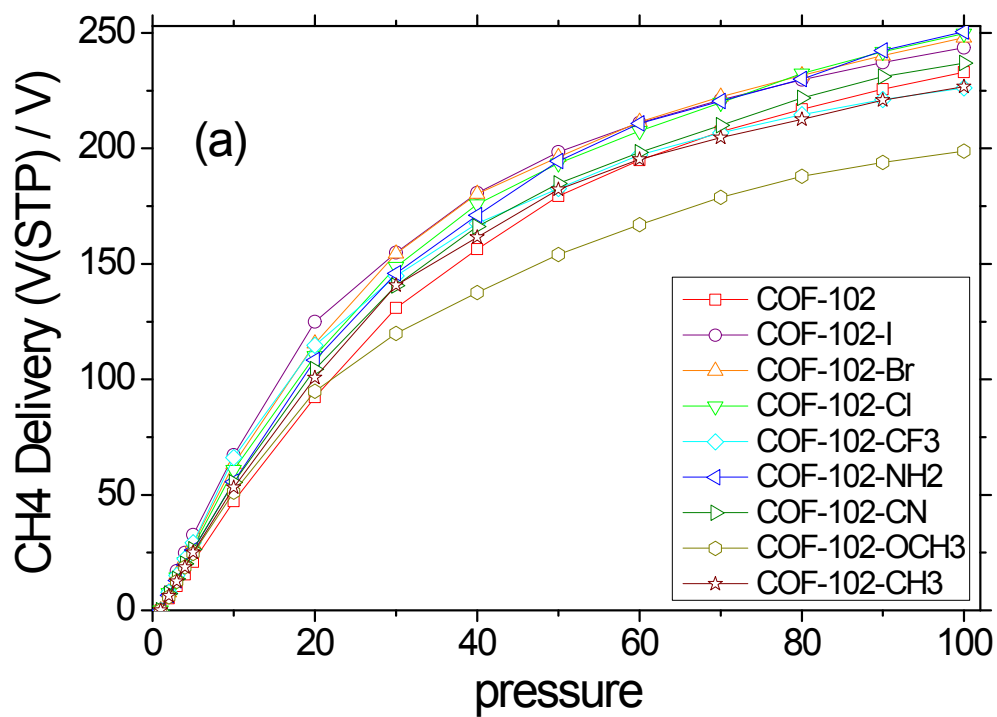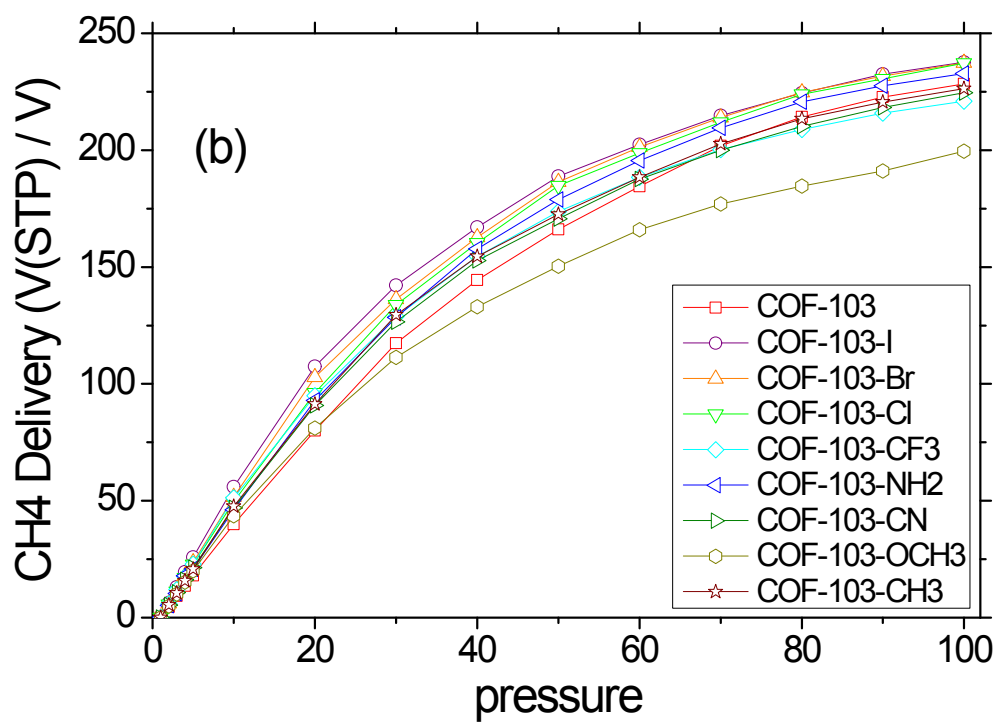

**Figure S2.** Complete isotherms of methane delivery at 298 K from 1 to 100 bar. (a) is for COF-102-Xs and (b) is for COF-103-Xs.
